# Supplementary material for: Development of a Method for Detection of SARS-CoV-2 Nucleocapsid Antibodies on Dried Blood Spot by DELFIA Immunoassay
Source: MDPI journal article supplement (doi:10.3390/diagnostics13050897), 2023-02-27
Supplement: s1 [file s1]

## Supplementary materials of

# Improvement in detecting SARS-CoV-2 nucleocapsid antibodies by DELFIA immunoassay in dried blood spots

Verena Damiani <sup>1,2,\*</sup>, Erika Pizzinato <sup>1,2</sup>, Ilaria Cicalini <sup>1,2</sup>, Gianmaria Demattia <sup>1</sup>, Mirco Zucchelli <sup>1,2</sup>, Luca Natale <sup>1</sup>, Claudia Palmarini <sup>1</sup>, Claudia Di Marzio <sup>1</sup>, Luca Federici <sup>1,2</sup>, Vincenzo De Laurenzi <sup>1,2</sup> and Damiana Pieragostino <sup>1,2</sup>

<sup>1</sup> Center for Advanced Studies and Technology (CAST), "G. d'Annunzio" University of Chieti-Pescara, 66100 Chieti, Italy

<sup>2</sup> Department of Innovative Technologies in Medicine and Dentistry, "G. d'Annunzio" University of Chieti-Pescara, 66100 Chieti, Italy

\* Correspondence: verena.damiani@unich.it, Tel. +390871355582

**Supplementary Table S1. Clinical parameters of the 47 plasma-DBS paired samples collected.**

| Subjects | Gender | Age | Date of SARS-CoV-2 infection | Vaccination Doses | Date of sample collection | Days after NPS |
|----------|--------|-----|------------------------------|-------------------|---------------------------|----------------|
| Pz1      | M      | 60  | -                            | 3                 | 30/08/2022                | -              |
| Pz2      | F      | 28  | -                            | 3                 | 27/05/2022                | -              |
| Pz3      | F      | 28  | -                            | 3                 | 27/05/2022                | -              |
| Pz4      | F      | 28  | -                            | 3                 | 27/05/2022                | -              |
| Pz5      | F      | 30  | -                            | 3                 | 27/05/2022                | -              |
| Pz6      | F      | 33  | -                            | 3                 | 27/05/2022                | -              |
| Pz7      | M      | 40  | -                            | 3                 | 27/05/2022                | -              |
| Pz8      | F      | 45  | -                            | 3                 | 27/05/2022                | -              |
| Pz9      | F      | 45  | -                            | 3                 | 27/05/2022                | -              |
| Pz10     | M      | 29  | -                            | 3                 | 29/04/2022                | -              |
| Pz11     | F      | 26  | -                            | 3                 | 29/04/2022                | -              |
| Pz12     | F      | 28  | -                            | 3                 | 29/04/2022                | -              |
| Pz13     | F      | 40  | -                            | 3                 | 18/10/2022                | -              |
| Pz14     | M      | 50  | -                            | 3                 | 29/04/2022                | -              |
| Pz15     | F      | 35  | -                            | 3                 | 20/09/2022                | -              |
| Pz16     | F      | 40  | 21/04/2022                   | 3                 | 27/05/2022                | 36             |
| Pz17     | F      | 28  | 29/01/2022                   | 2                 | 27/05/2022                | 119            |
| Pz18     | F      | 30  | 02/05/2022                   | 3                 | 27/05/2022                | 22             |
| Pz19     | F      | 30  | 09/04/2022                   | 3                 | 27/05/2022                | 48             |
| Pz20     | F      | 37  | 17/04/2022                   | 3                 | 27/05/2022                | 40             |
| Pz21     | F      | 27  | 08/04/2022                   | 3                 | 27/05/2022                | 49             |
| Pz22     | F      | 26  | 16/12/2021                   | 2                 | 27/05/2022                | 162            |
| Pz23     | M      | 45  | 22/04/2022                   | 3                 | 27/05/2022                | 35             |
| Pz24     | F      | 40  | 05/04/2022                   | 3                 | 27/05/2022                | 52             |
| Pz25     | M      | 50  | 22/02/2022                   | 3                 | 27/05/2022                | 94             |
| Pz26     | F      | 47  | 11/04/2022                   | 3                 | 27/05/2022                | 46             |
| Pz27     | F      | 42  | 24/04/2022                   | 3                 | 27/05/2022                | 33             |
| Pz28     | M      | 30  | 14/04/2022                   | 3                 | 27/05/2022                | 43             |
| Pz29     | F      | 35  | 05/03/2022                   | 3                 | 29/04/2022                | 55             |
| Pz30     | M      | 30  | 14/04/2022                   | 3                 | 29/04/2022                | 15             |
| Pz31     | M      | 40  | 10/02/2022                   | 3                 | 29/04/2022                | 78             |
| Pz32     | F      | 40  | 05/04/2022                   | 3                 | 29/04/2022                | 24             |
| Pz33     | F      | 40  | 30/03/2022                   | 3                 | 29/04/2022                | 30             |
| Pz34     | F      | 35  | 12/04/2022                   | 3                 | 29/04/2022                | 17             |
| Pz35     | M      | 25  | 28/03/2022                   | 3                 | 29/04/2022                | 32             |
| Pz36     | F      | 26  | 03/03/2021                   | 2                 | 29/04/2022                | 422            |
| Pz37     | F      | 40  | 15/04/2022                   | 3                 | 29/04/2022                | 14             |
| Pz38     | M      | 28  | 08/04/2022                   | 3                 | 29/04/2022                | 21             |
| Pz39     | F      | 28  | 19/04/2022                   | 3                 | 29/04/2022                | 10             |
| Pz40     | F      | 30  | 06/01/2022                   | 3                 | 29/04/2022                | 113            |
| Pz41     | F      | 45  | 29/04/2021                   | 3                 | 29/04/2022                | 365            |
| Pz42     | M      | 26  | 03/03/2021                   | 2                 | 29/04/2022                | 422            |
| Pz43     | M      | 30  | 28/12/2021                   | 3                 | 29/04/2022                | 122            |
| Pz44     | F      | 28  | 10/02/2022                   | 3                 | 27/09/2022                | 230            |
| Pz45     | F      | 40  | 21/04/2022                   | 3                 | 28/09/2022                | 160            |
| Pz46     | M      | 50  | 15/07/2022                   | 3                 | 28/09/2022                | 75             |
| Pz47     | F      | 40  | 05/04/2022                   | 3                 | 28/09/2022                | 177            |

NPS: nasopharyngeal swab.

**Supplementary Table S2. Linearity assessment of ELISA and DBS-DELFI methods analyzing SARS-CoV-2 IgG anti-N on sequential dilutions.**

| Dilution percentage | ELISA (OD)     | DBS-DELFI (TRF)      |
|---------------------|----------------|----------------------|
| 100                 | 3.3255 ± 0.002 | 1143229 ± 264386.5   |
| 90                  | 3.3345 ± 0.002 | 1219575 ± 258587.5   |
| 80                  | 3.3395 ± 0.009 | 1054604.5 ± 143594.3 |
| 50                  | 3.1235 ± 0.027 | 685142.5 ± 96684.83  |
| 40                  | 3.042 ± 0.019  | 554589.5 ± 83251.22  |
| 20                  | 1.9635 ± 0.293 | 318760 ± 7471.29     |
| 13.3                | 1.3125 ± 0.094 | 252103.5 ± 20023.14  |
| 11.7                | 1.1705 ± 0.058 | 208391.5 ± 16283.96  |
| 10                  | 0.88 ± 0.091   | 203548 ± 73194.04    |
| 5                   | 0.462 ± 0.046  | 71840.5 ± 6482.05    |
| 2                   | 0.241 ± 0.033  | 58652 ± 10674.84     |
| 1                   | 0.191 ± 0.026  | 30351 ± 4912.97      |
| 0.5                 | 0.114 ± 0.007  | 18839 ± 1179.45      |
| 0                   | 0.0695 ± 0.026 | 179098 ± 214.96      |

Values are presented as mean ± SD.

**Supplementary Table S3. Data of the set-up experiment for ELISA to DELFIA and next to DBS-DELFI conversion.**

|     | ELISA (OD)   | DELFI(plasma)    | DBS-DELFI          |
|-----|--------------|------------------|--------------------|
| NEG | 0.144 ± 0.02 | 24067.5 ± 678.11 | 93547.5 ± 12087.99 |
| POS | 2.47 ± 0.06  | 510238 ± 11641.8 | 496748 ± 96228.75  |

Values are presented as mean ± SD. POS: subject tested positive for SARS-CoV-2 IgG anti-N. NEG: subject tested negative for SARS-CoV-2 IgG anti-N.

**Supplementary Table S4. Data of analytical sensitivity of ELISA and DBS-DELFI A immunoassays used to evaluate assay precision.**

| Subjects | OD                    | ELISA CV%   | TRF                         | DBS-DELFI A CV% |
|----------|-----------------------|-------------|-----------------------------|-----------------|
| Pz1      | 0,099 ± 0,02          | 19,99897967 | 14603,5 ± 2034,85           | 13,93053863     |
| Pz2      | 0,05 ± 0,01           | 11,3137085  | 15729,5 ± 2322,85           | 14,76744827     |
| Pz3      | 0,051 ± 0,00          | 5,545935539 | 14264 ± 479,4               | 3,361037561     |
| Pz4      | 0,0555 ± 0,00         | 3,822198817 | 16418 ± 1678,7              | 10,22457972     |
| Pz5      | 0,0605 ± 0,00         | 3,506314617 | 15875,5 ± 557,9             | 3,514265695     |
| Pz6      | 0,0535 ± 0,00         | 1,321694918 | 14637 ± 1377,44             | 9,41069898      |
| Pz7      | 0,0755 ± 0,01         | 8,429087458 | 16915,5 ± 2334,2            | 13,79893875     |
| Pz8      | 0,0755 ± 0,00         | 4,682826365 | 16996,5 ± 1668,1            | 9,814167016     |
| Pz9      | 0,062 ± 0,01          | 9,123958467 | 17855 ± 569,9               | 3,191980205     |
| Pz10     | 0,064 ± 0,01          | 8,838834765 | 14500,5 ± 4673,3            | 32,2283281      |
| Pz11     | 0,0945 ± 0,00         | 3,741305721 | 6911,5 ± 589,02             | 8,522317134     |
| Pz12     | 0,0765 ± 0,00         | 0,92432259  | 16384 ± 1977,1              | 12,06708106     |
| Pz13     | 0,083 ± 0,01          | 15,33484586 | 19029,5 ± 5130,1            | 26,95845764     |
| Pz14     | 0,188 ± 0,01          | 3,761206283 | 19272,5 ± 381,1             | 1,977587521     |
| Pz15     | 0,0715 ± 0,00         | 6,922723732 | 15924 ± 1146,9              | 7,202506902     |
| Pz16     | <b>1,3275 ± 0,06</b>  | 4,847210327 | <b>111569 ± 19076,33</b>    | 17,09823225     |
| Pz17     | <b>1,1945 ± 0,11</b>  | 8,938729507 | <b>66692 ± 6301,74</b>      | 9,449012826     |
| Pz18     | <b>1,264 ± 0,11</b>   | 8,950718749 | <b>61184 ± 17591,4</b>      | 28,7516385      |
| Pz19     | <b>1,179 ± 0,02</b>   | 1,559353377 | <b>78162,5 ± 14902,28</b>   | 19,06576096     |
| Pz20     | <b>1,0055 ± 0,03</b>  | 2,883279764 | <b>53203,5 ± 19945,36</b>   | 37,48881366     |
| Pz21     | <b>0,4115 ± 0,01</b>  | 1,546527589 | <b>24065 ± 534,57</b>       | 2,22137015      |
| Pz22     | <b>2,26 ± 0,03</b>    | 1,251516427 | <b>323392,5 ± 108295,5</b>  | 33,48733346     |
| Pz23     | <b>0,6405 ± 0,03</b>  | 4,747164963 | <b>49478,5 ± 902,98</b>     | 1,824985316     |
| Pz24     | 0,181 ± 0,01          | 3,906667299 | <b>20967 ± 1525,95</b>      | 7,277800514     |
| Pz25     | 0,1885 ± 0,02         | 8,627828099 | <b>32906 ± 1552,8</b>       | 4,718915977     |
| Pz26     | <b>1,1605 ± 0,02</b>  | 1,401418007 | <b>80897,5 ± 4813,3</b>     | 5,949845001     |
| Pz27     | 0,086 ± 0,01          | 11,51104062 | 17860 ± 1452,4              | 8,1321239       |
| Pz28     | <b>1,06315 ± 0,07</b> | 6,671006928 | <b>102720 ± 32567,9</b>     | 31,70553361     |
| Pz29     | <b>0,79 ± 0,04</b>    | 4,65437375  | <b>122513 ± 30289,6</b>     | 24,72360164     |
| Pz30     | <b>0,394 ± 0,01</b>   | 2,871499619 | <b>49161 ± 11780,4</b>      | 23,96289533     |
| Pz31     | <b>0,209 ± 0,00</b>   | 2,029971621 | <b>29539 ± 9090,6</b>       | 30,77478851     |
| Pz32     | 0,084 ± 0,00          | 0           | <b>27360 ± 507,7</b>        | 1,85563841      |
| Pz33     | <b>0,6795 ± 0,02</b>  | 2,393444587 | <b>64737 ± 13457,7</b>      | 20,7881988      |
| Pz34     | <b>0,499 ± 0,00</b>   | 0           | <b>29567,5 ± 6129,9</b>     | 20,73191405     |
| Pz35     | <b>0,711 ± 0,05</b>   | 6,762765277 | <b>56184,5 ± 13461,2</b>    | 23,95890645     |
| Pz36     | 0,071 ± 0,00          | 3,983700176 | 10154,5 ± 2331,33           | 22,9586002      |
| Pz37     | <b>0,3605 ± 0,04</b>  | 12,35720588 | <b>43811 ± 15793,94</b>     | 36,05016335     |
| Pz38     | <b>1,318 ± 0,12</b>   | 9,442397078 | <b>96709 ± 626,5</b>        | 0,647816241     |
| Pz39     | 0,0685 ± 0,00         | 3,09681802  | 13628,5 ± 801,15            | 5,87850448      |
| Pz40     | <b>3,167 ± 0,02</b>   | 0,580510777 | <b>731559,5 ± 208206,88</b> | 28,46069043     |
| Pz41     | 0,0535 ± 0,00         | 1,321694918 | 11663 ± 428,51              | 3,67406936      |
| Pz42     | <b>0,512 ± 0,03</b>   | 5,800485314 | <b>410844 ± 10726,81</b>    | 2,610920415     |
| Pz43     | <b>1,172 ± 0,05</b>   | 4,223334017 | <b>88704,5 ± 12679,13</b>   | 14,29367359     |
| Pz44     | 0,1315 ± 0,01         | 11,29219955 | <b>21160,5 ± 5699,99</b>    | 26,93692381     |
| Pz45     | <b>0,9565 ± 0,02</b>  | 2,29172088  | <b>47251,5 ± 2976,21</b>    | 6,298662354     |
| Pz46     | <b>3,2965 ± 0,01</b>  | 0,235952513 | <b>357352,5 ± 31172,8</b>   | 8,72326413      |
| Pz47     | 0,138 ± 0,03          | 19,47105629 | <b>32807 ± 784,89</b>       | 2,392442244     |

Values are presented as mean ± SD.
